# Supplementary material for: Resilience does not explain the dissociation between chronic pain and physical activity in South Africans living with HIV
Source: PubMed Central journal article supplement (PMC5028784; doi:10.7717/peerj.2464), 2016-09-13

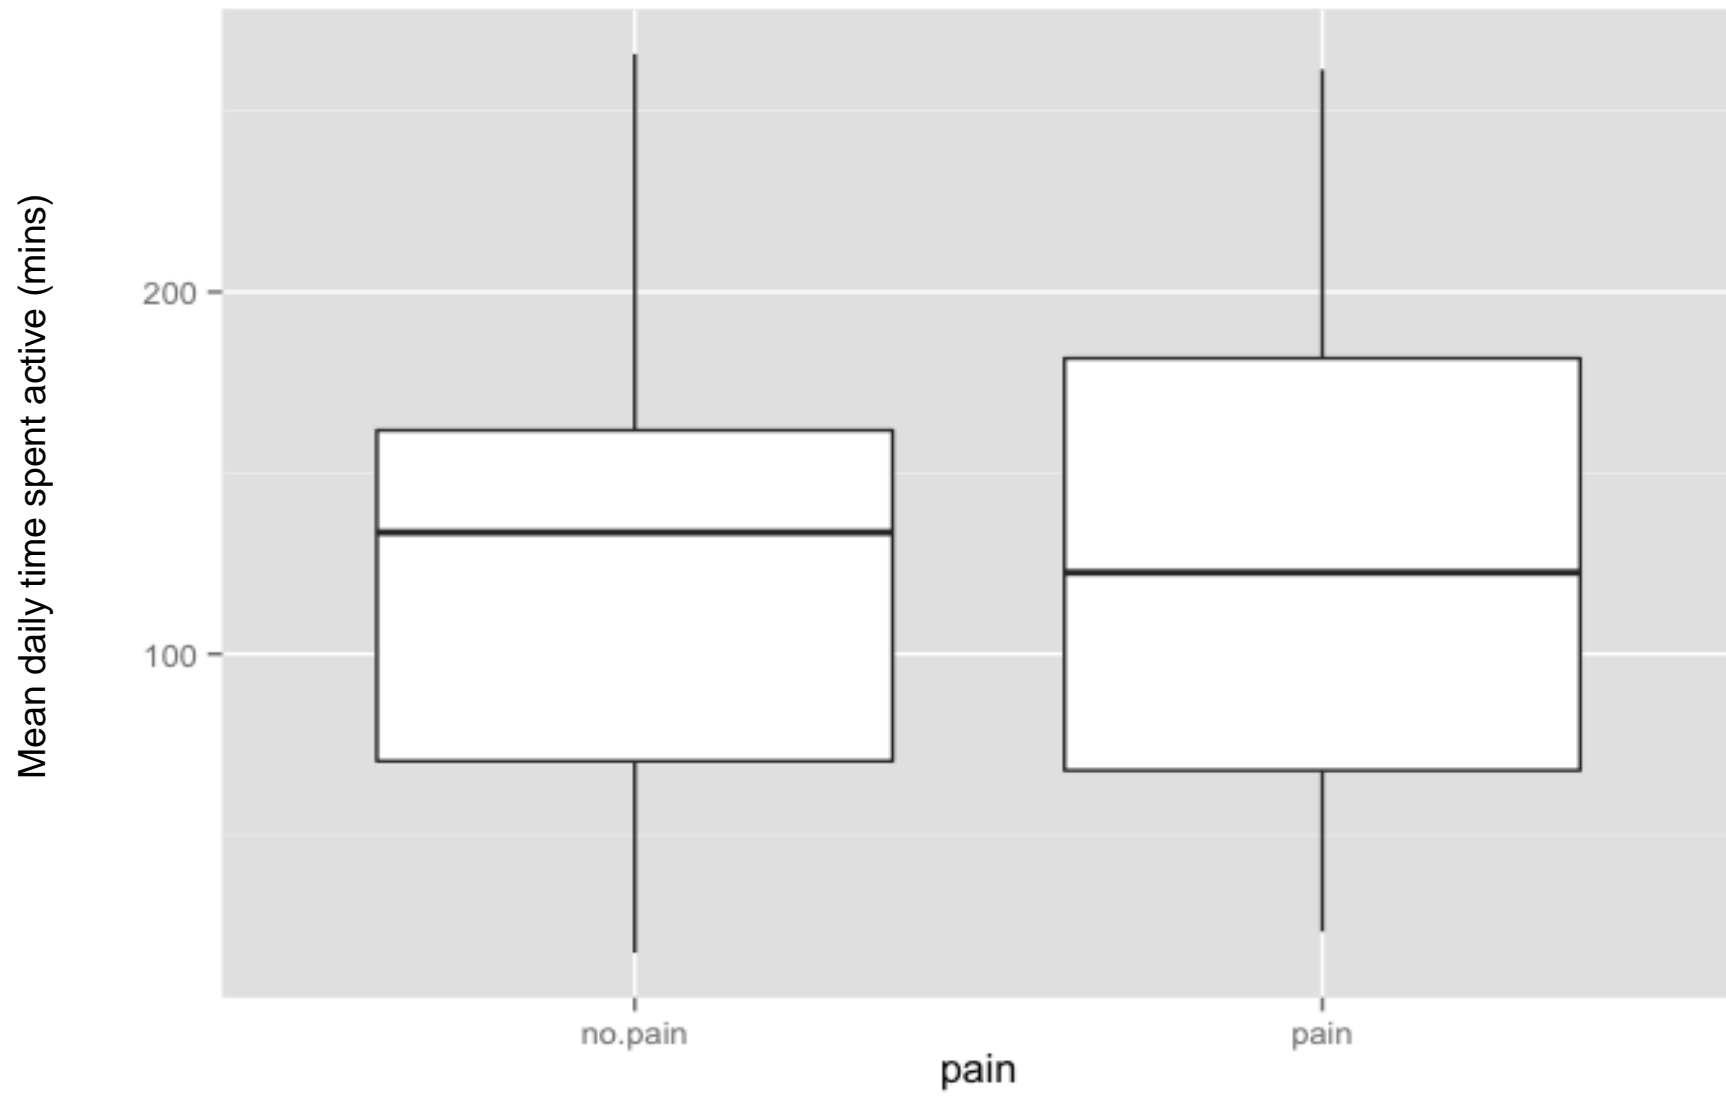

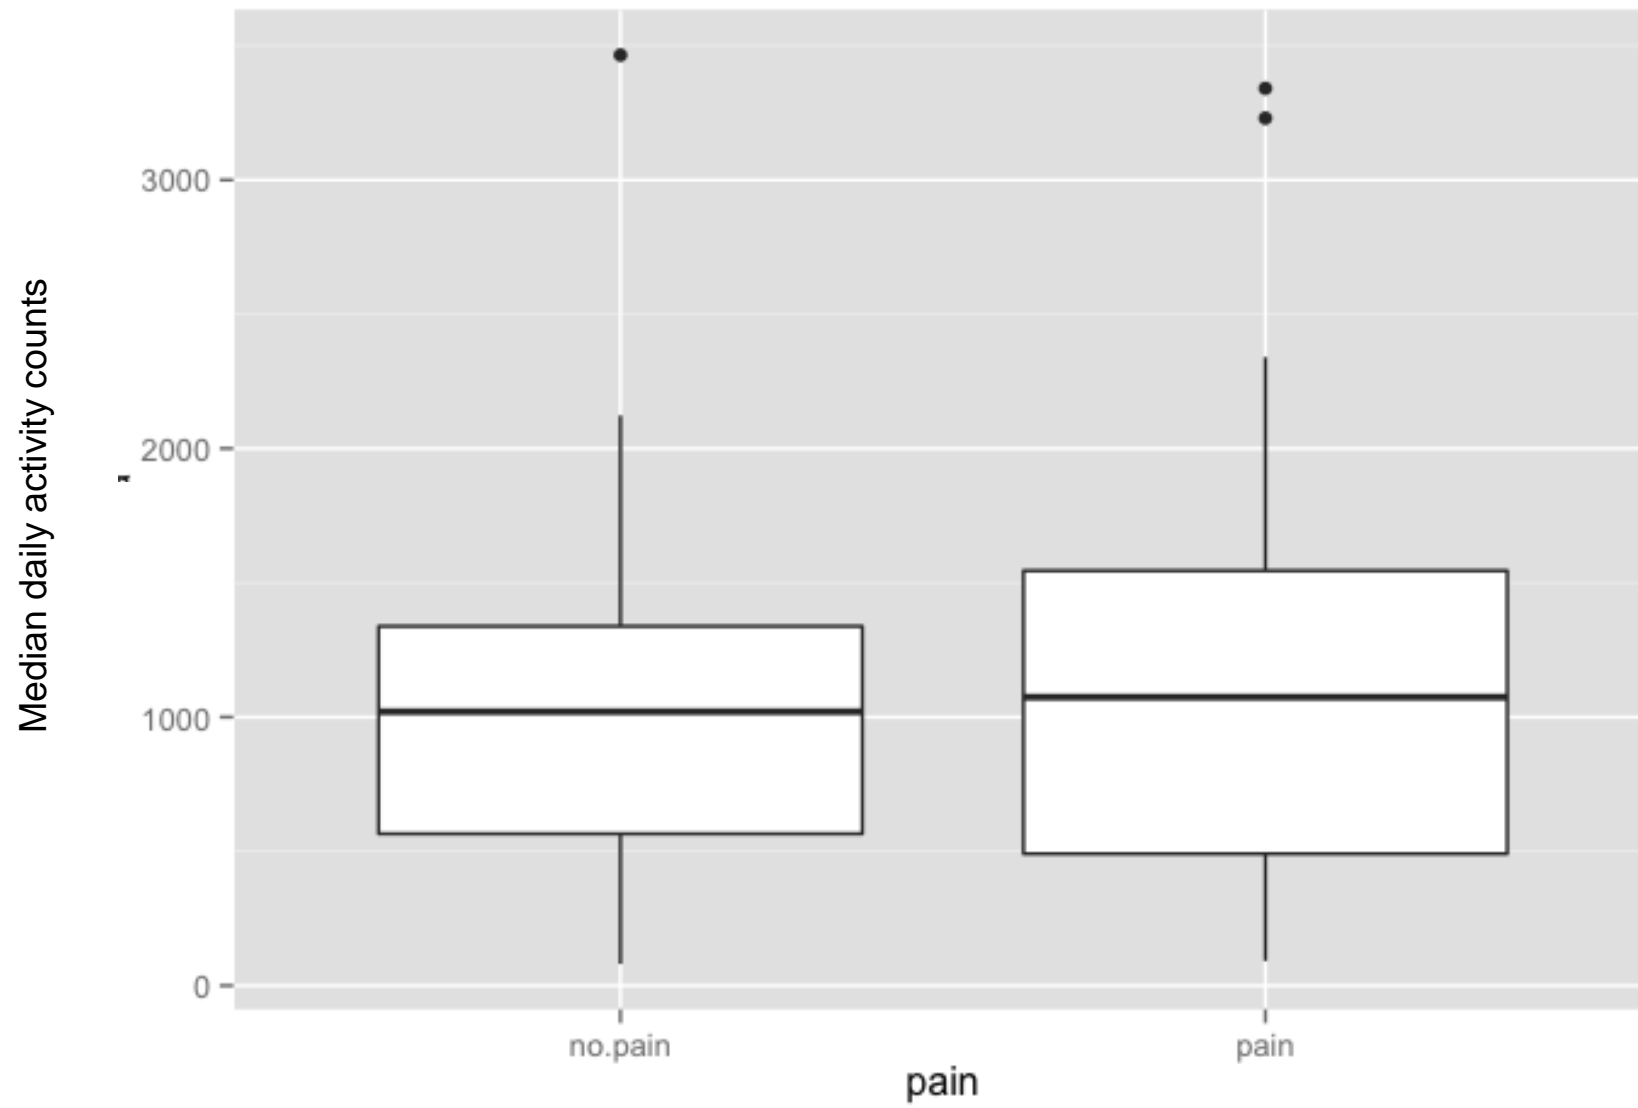

Supplement: peerj-04-2464-s003.pdf [file peerj-04-2464-s003.pdf]
