# Supplementary material for: Resilience does not explain the dissociation between chronic pain and physical activity in South Africans living with HIV
Source: PubMed Central journal article supplement (PMC5028784; doi:10.7717/peerj.2464), 2016-09-13

**Resilience Scale score vs median activity**

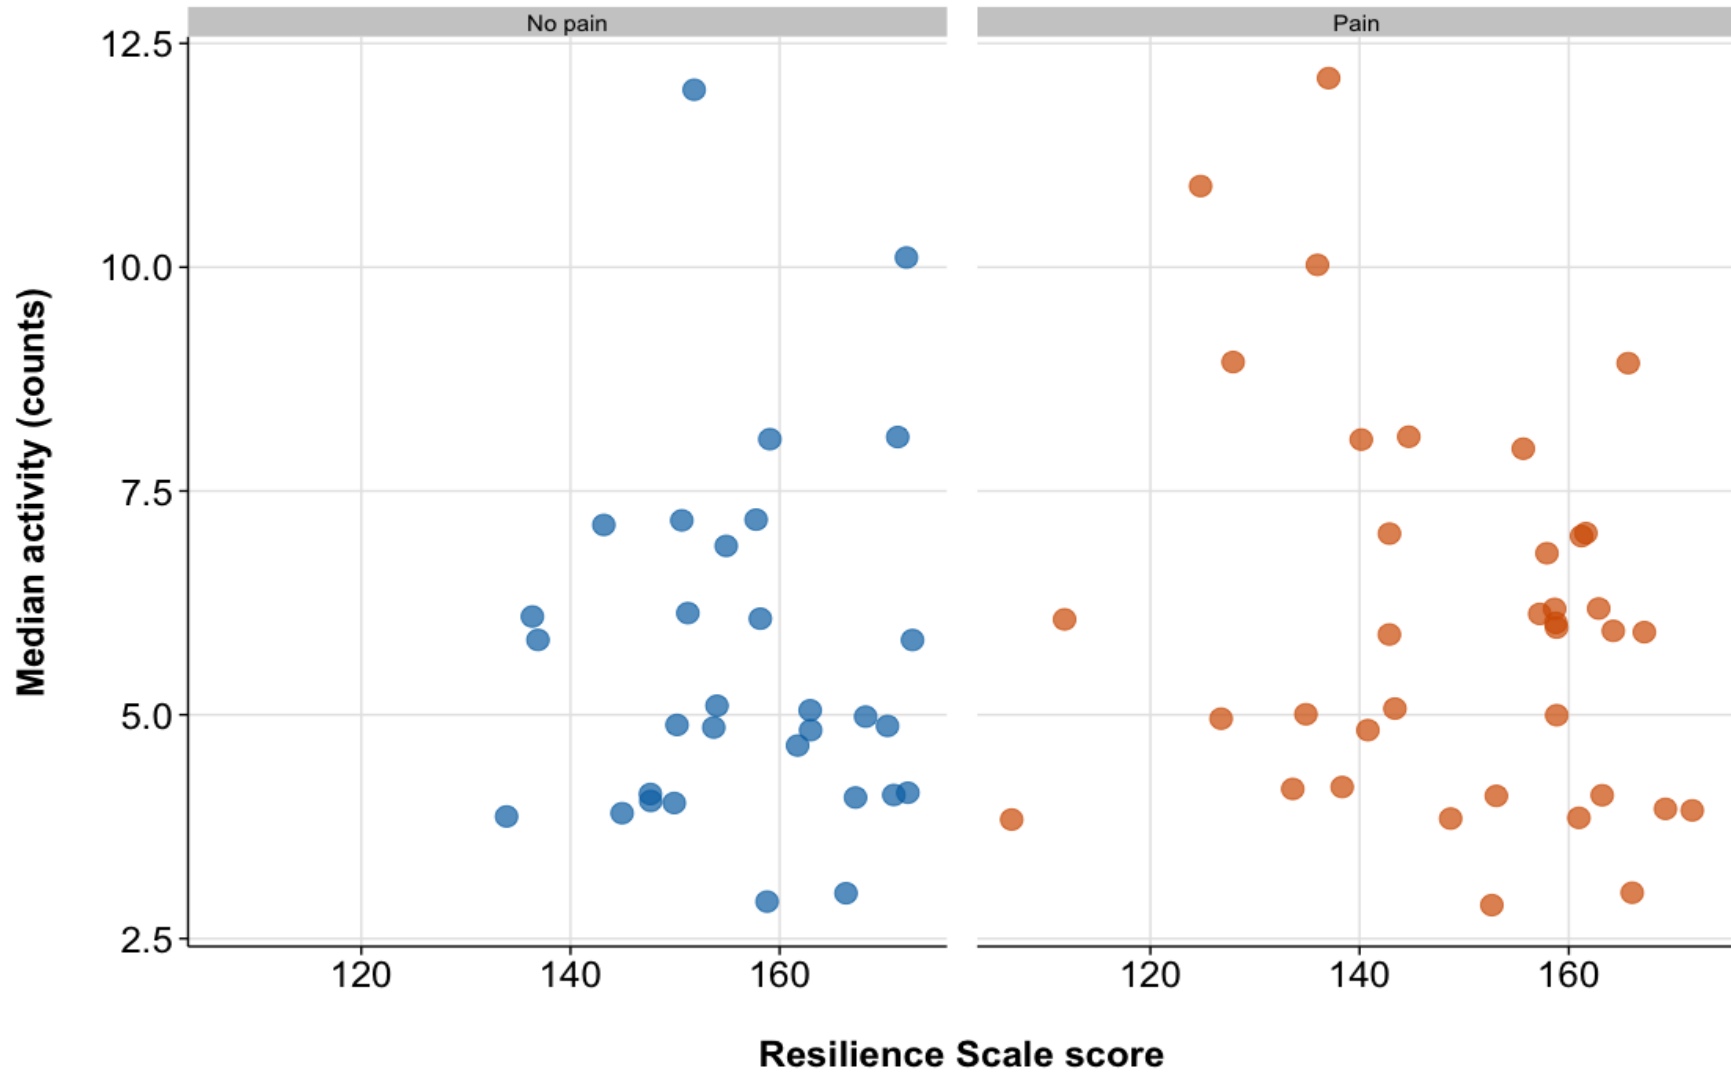

### Time spent at 0% of maximum activity

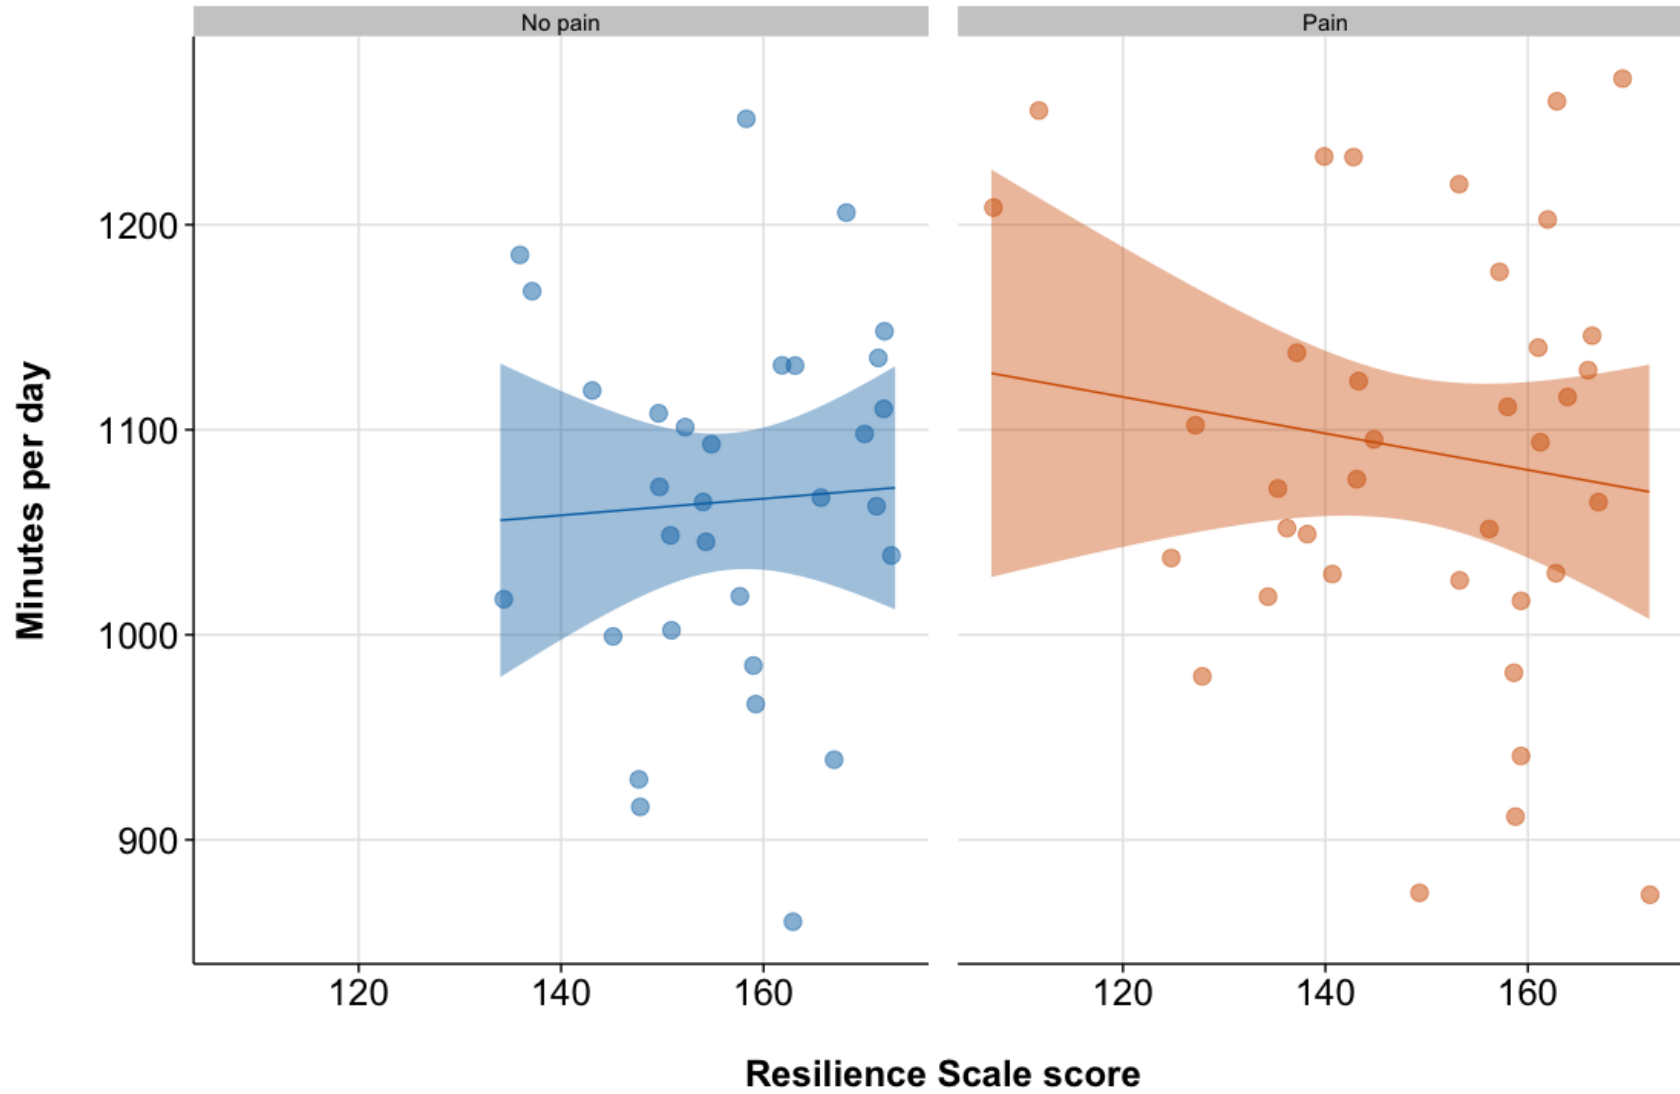

### Time spent at 1-24% of maximum activity

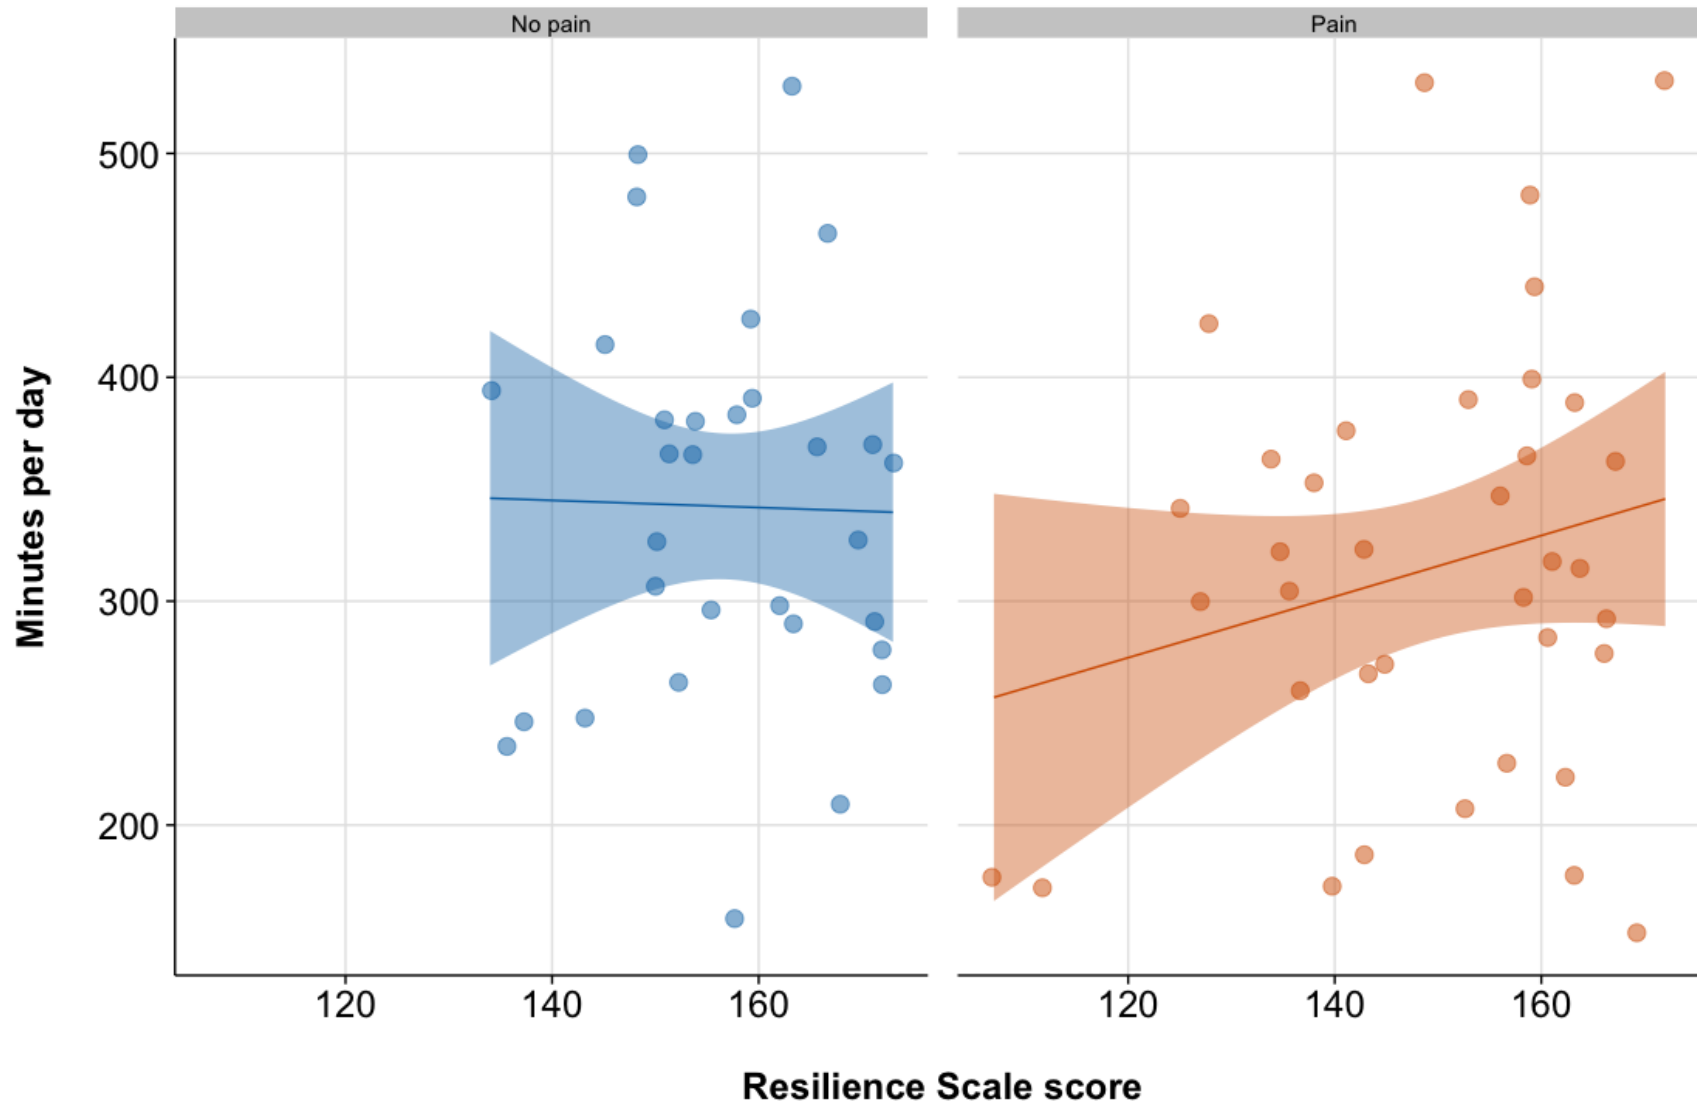

### Time spent at 25-49% of maximum activity

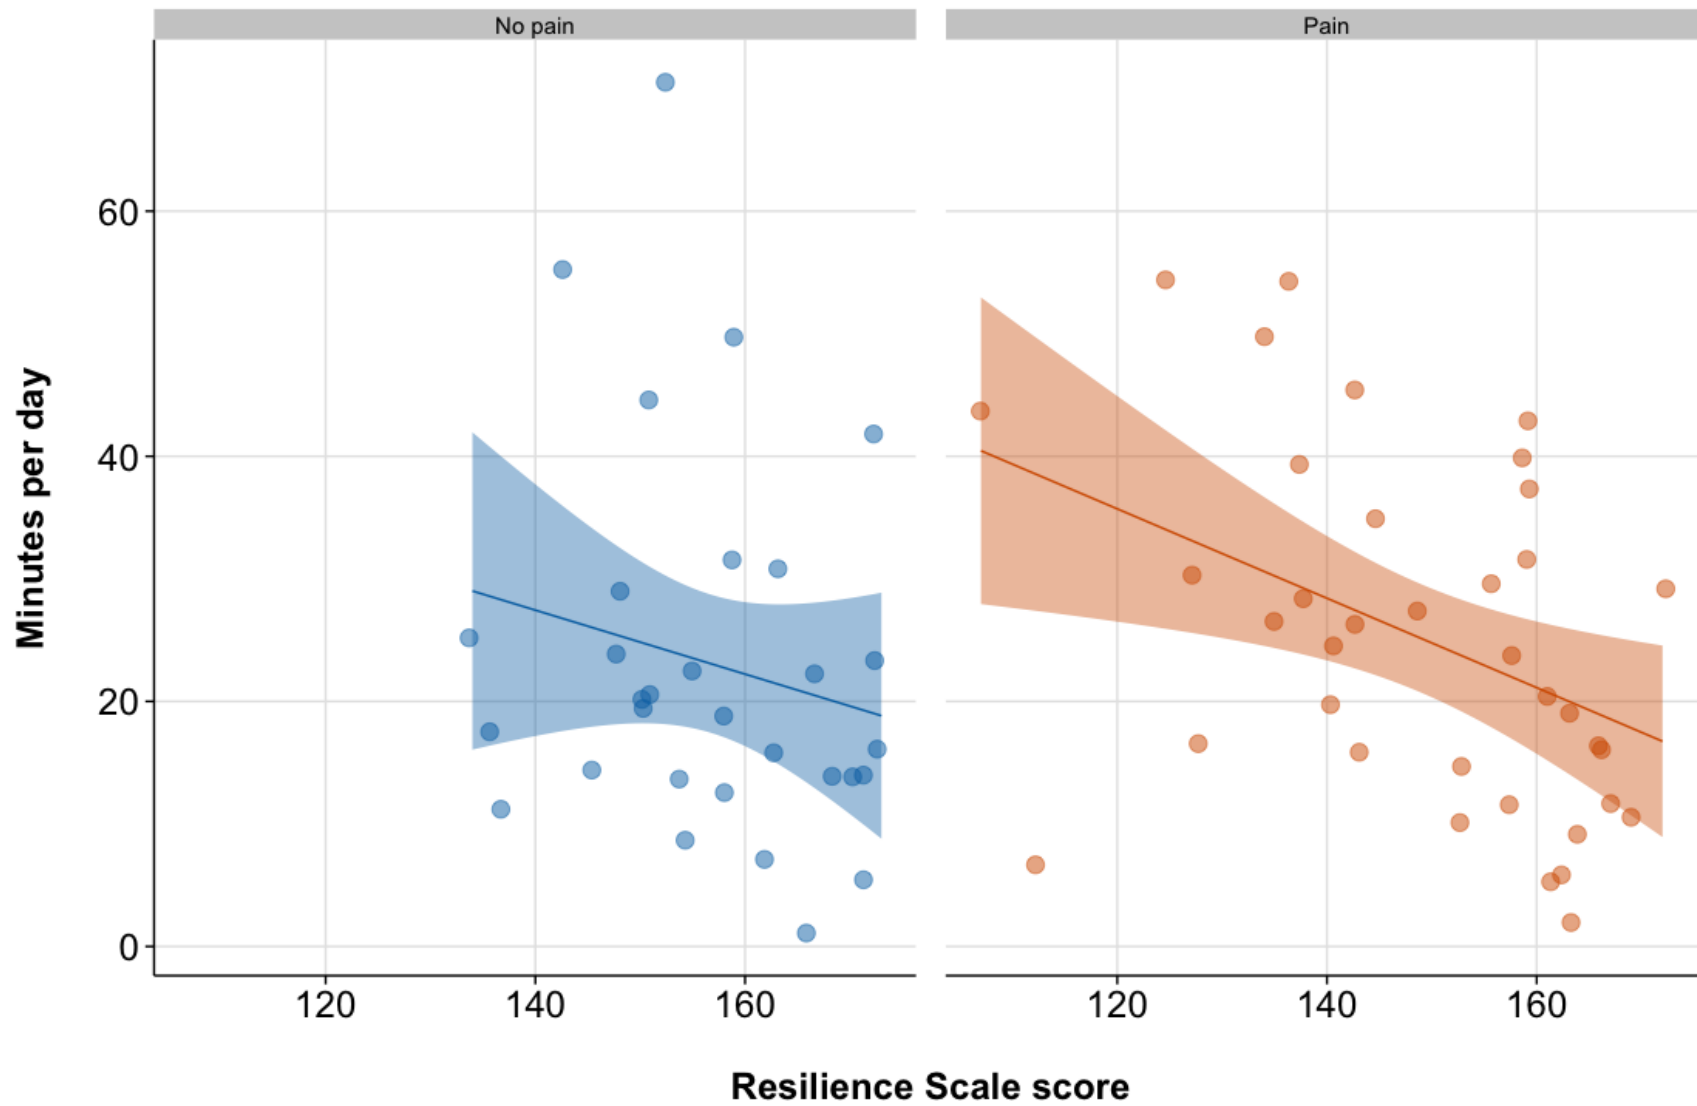

### Time spent at 50-74% of maximum activity

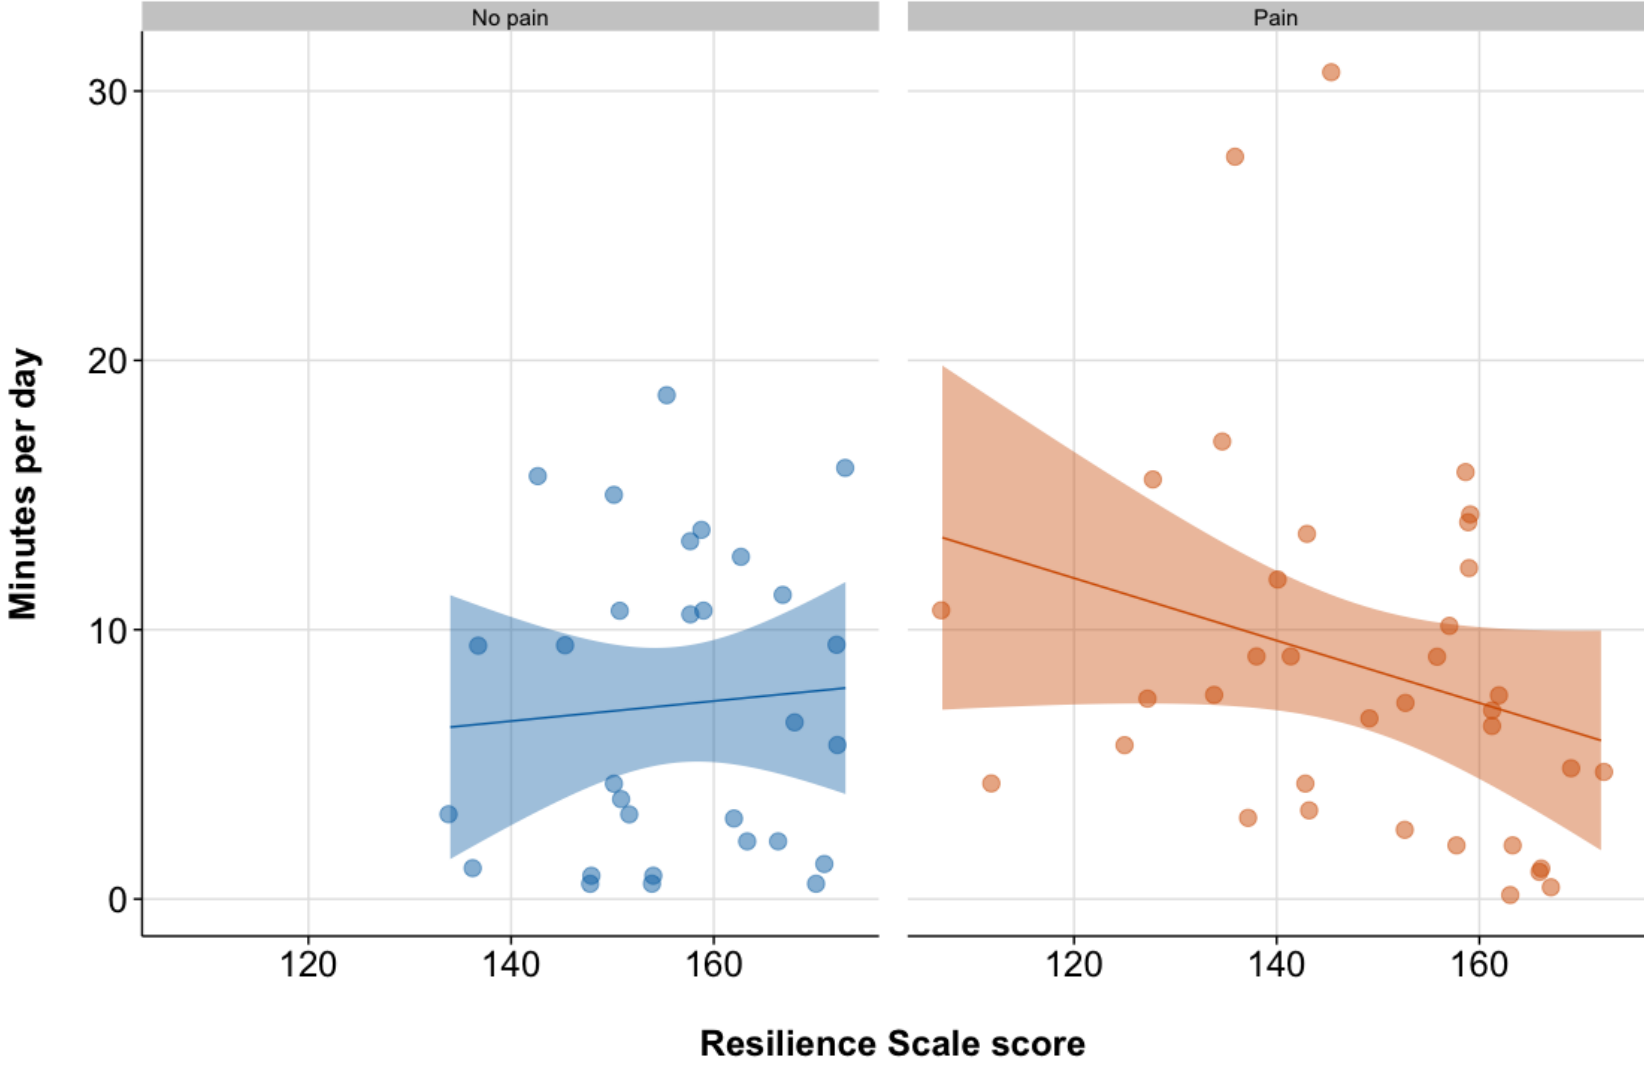

### Time spent at >75% of maximum activity

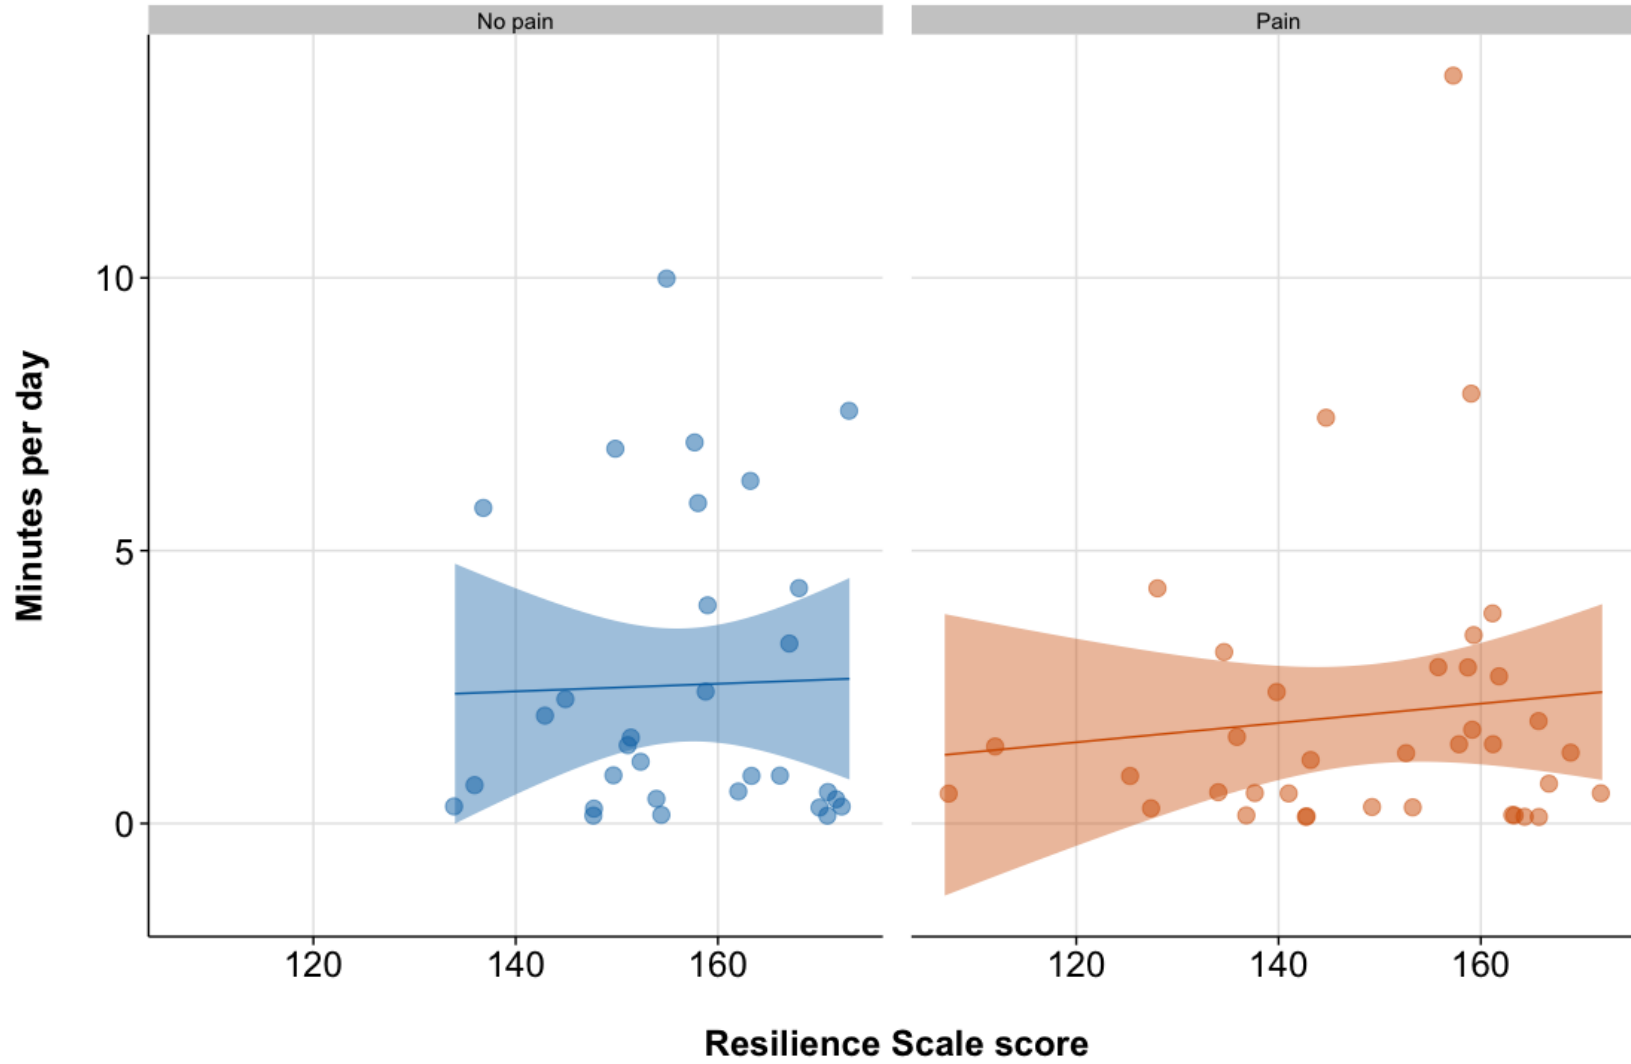

Supplement: peerj-04-2464-s004.pdf [file peerj-04-2464-s004.pdf]
