# Supplementary material for: Resilience does not explain the dissociation between chronic pain and physical activity in South Africans living with HIV
Source: PubMed Central journal article supplement (PMC5028784; doi:10.7717/peerj.2464), 2016-09-13

**Pain interference vs intensity of activity**

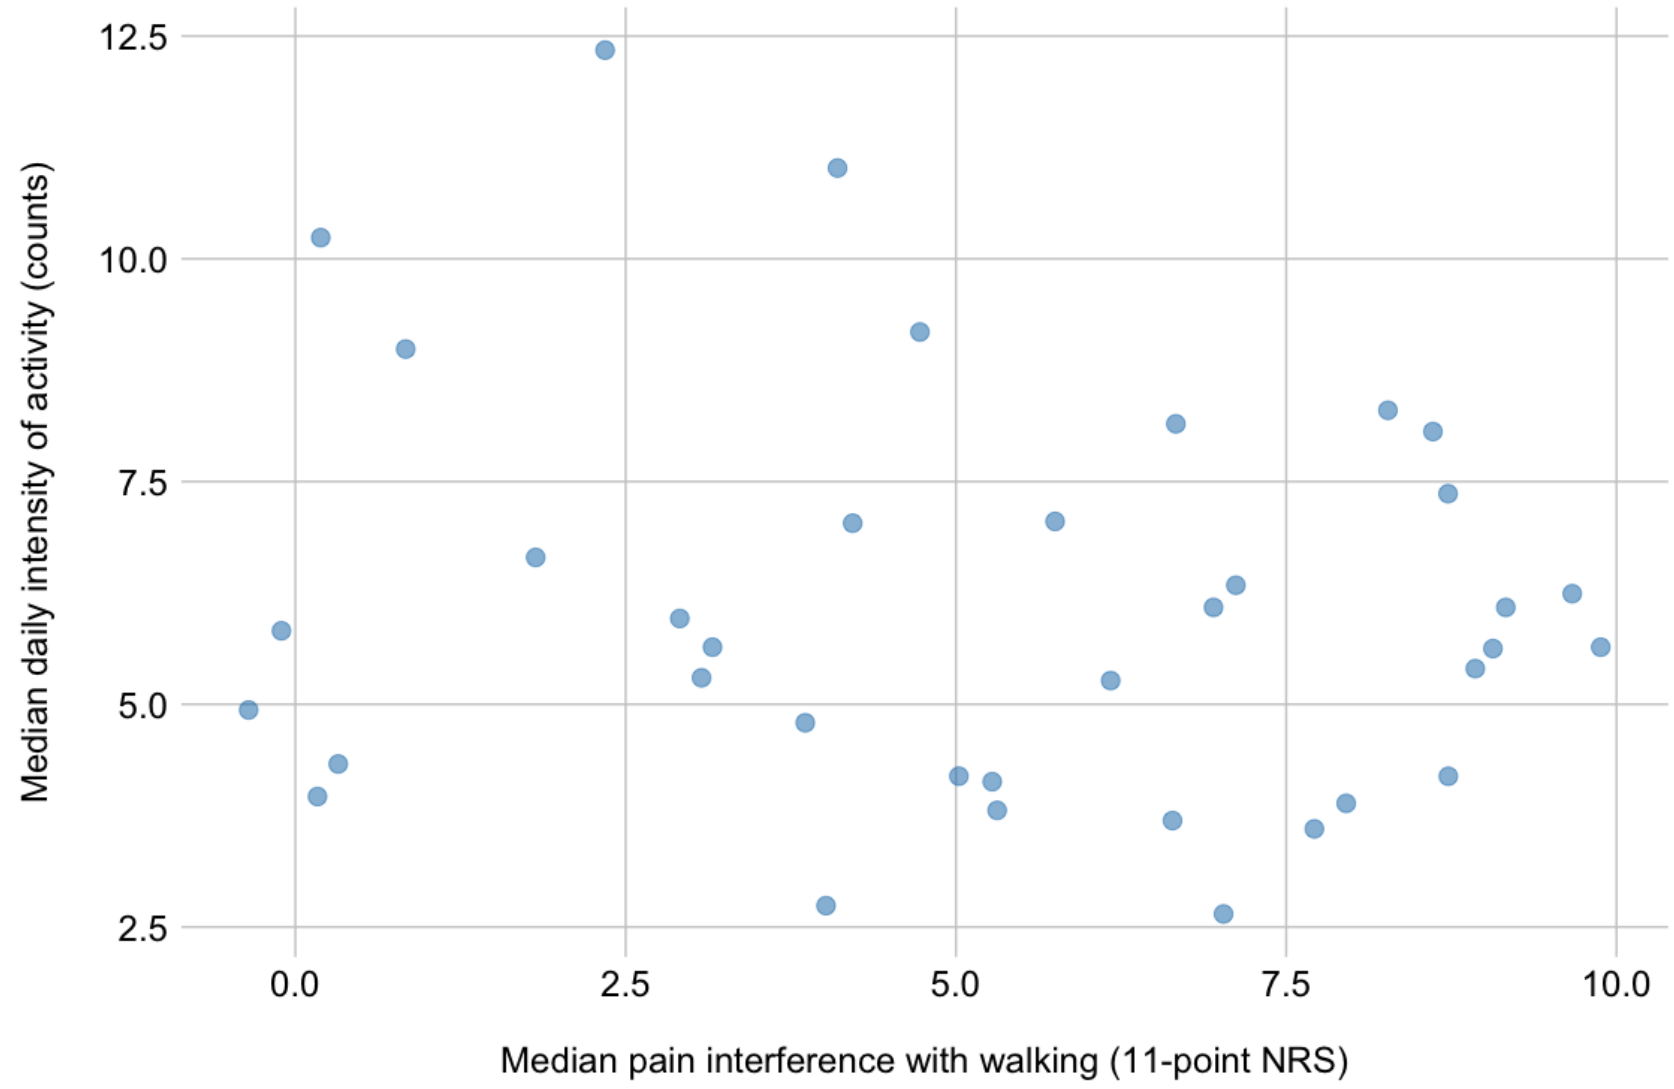

**Pain interference vs time active**

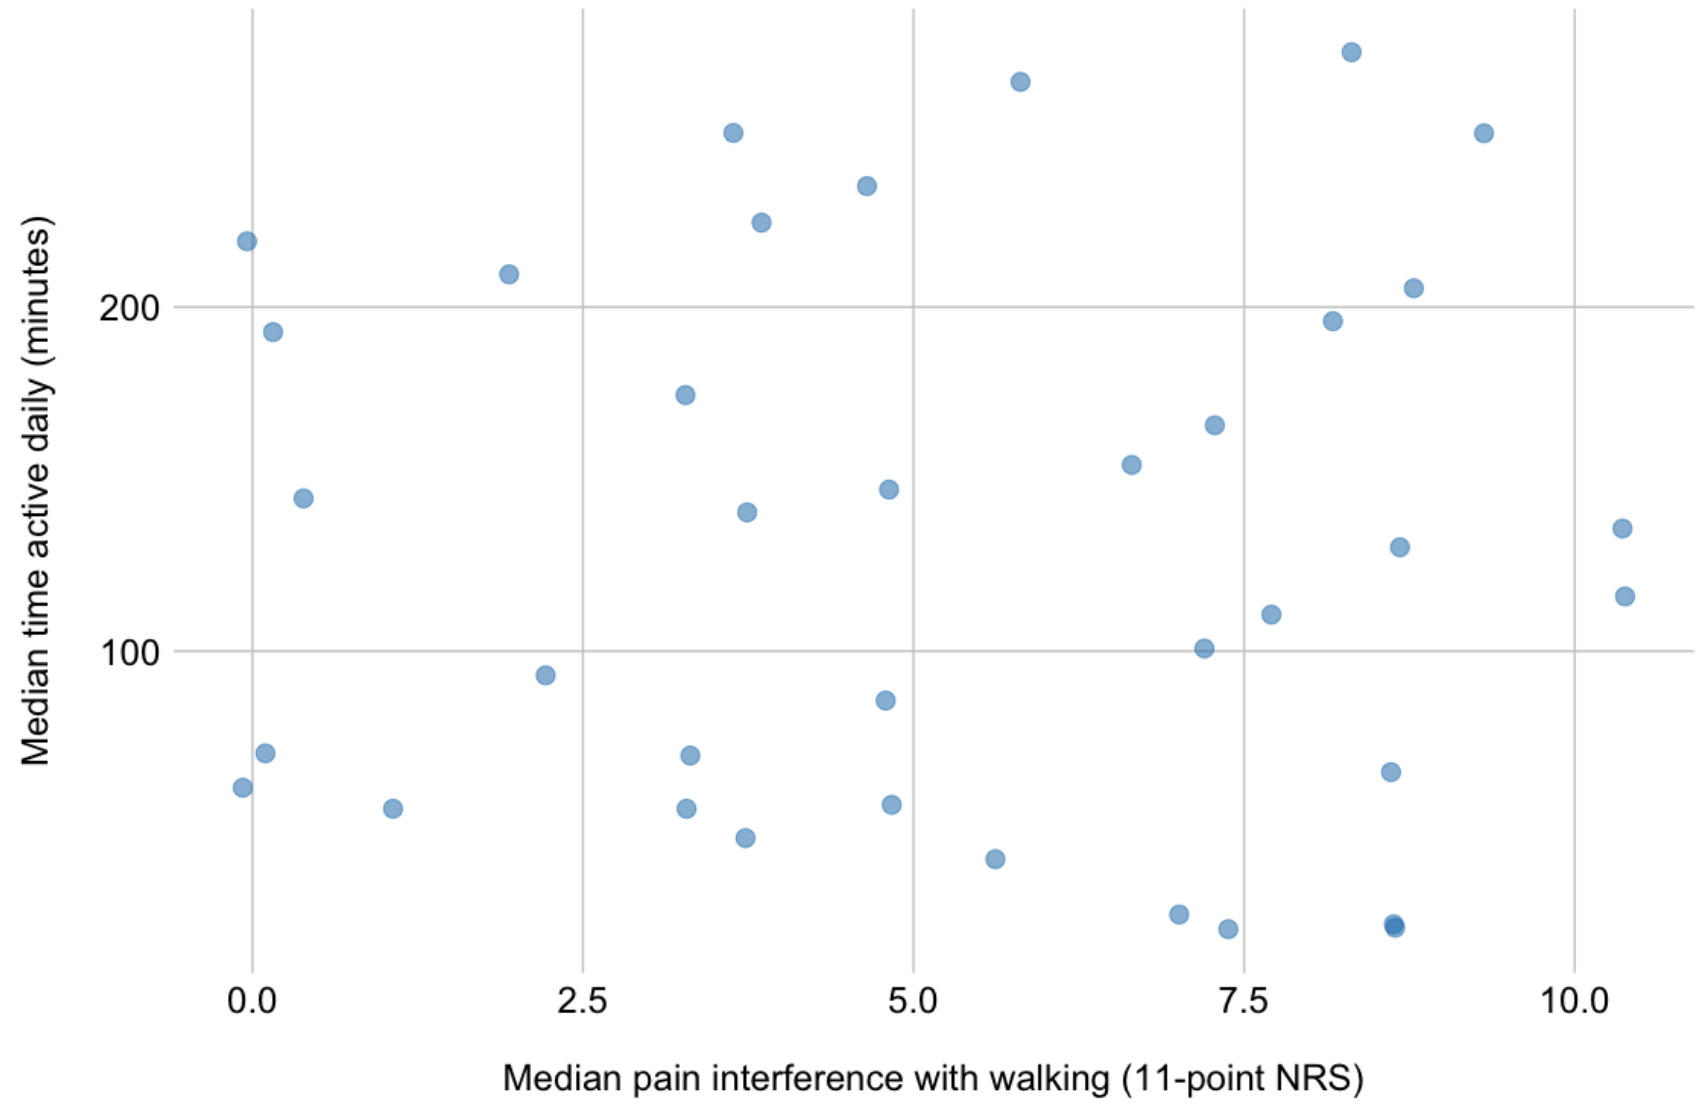

EQ5D mobility rating vs intensity of activity

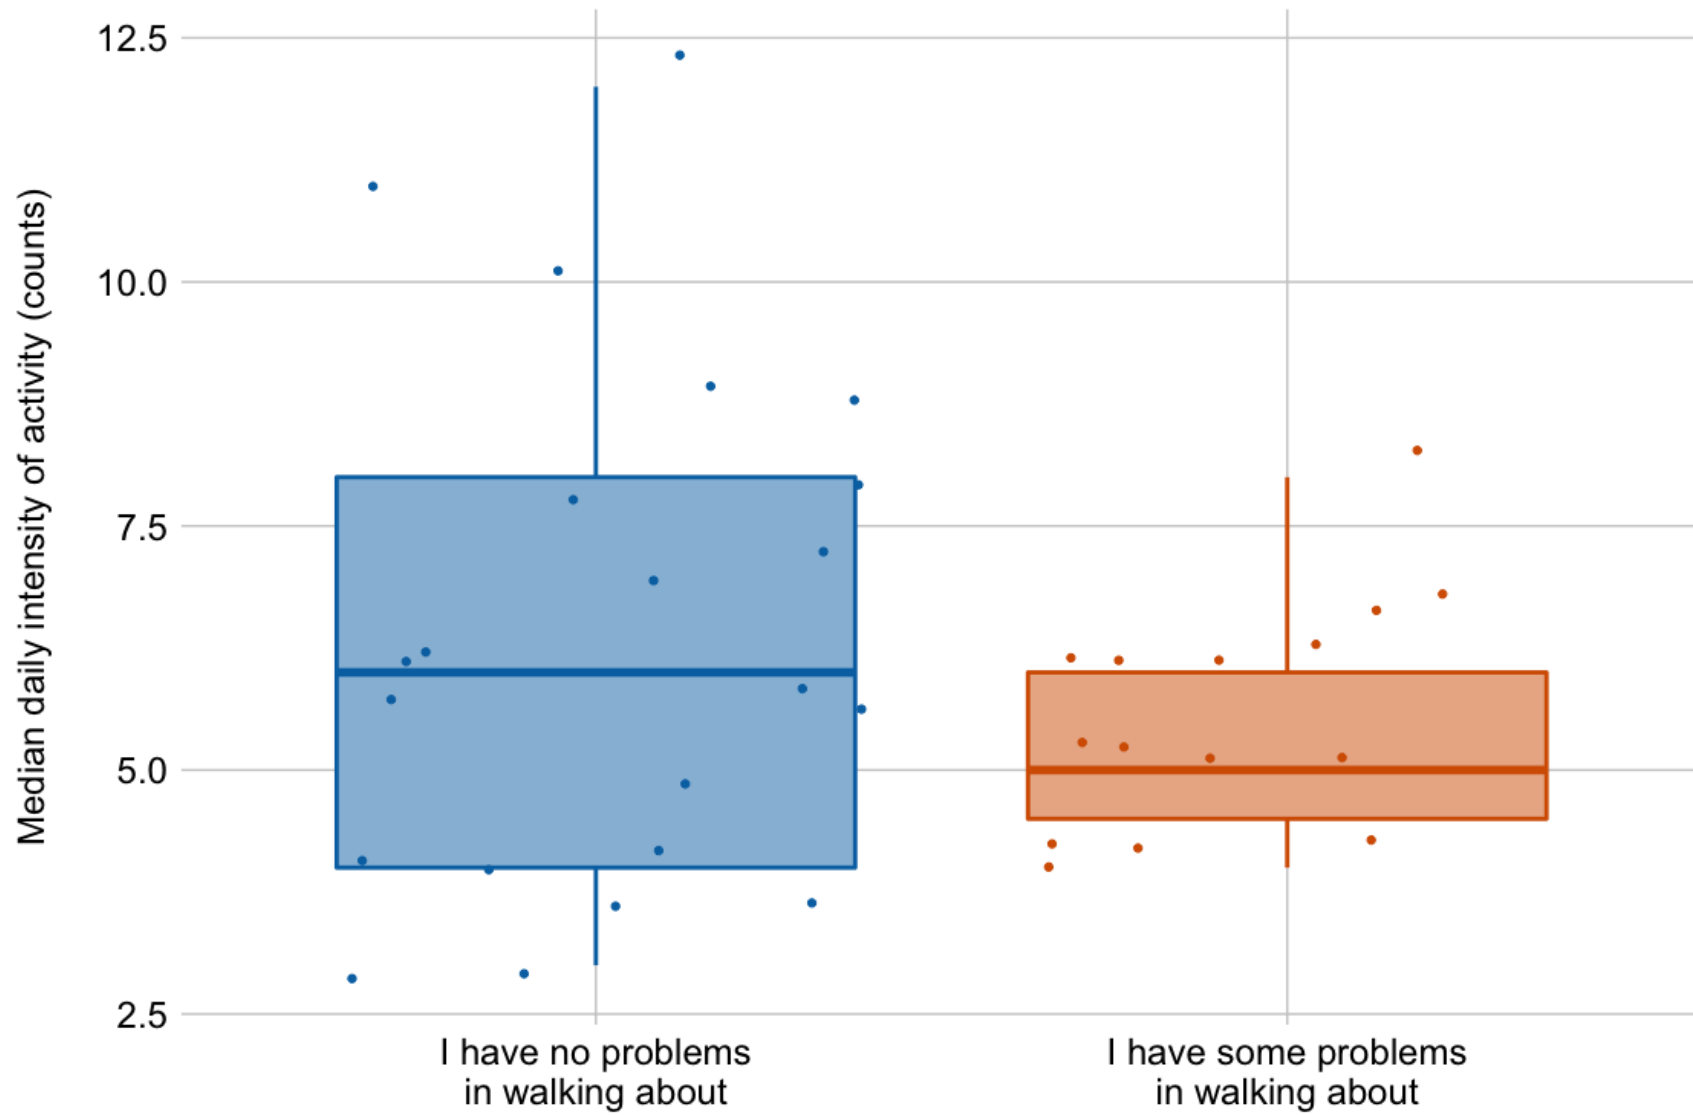

EQ5D mobility rating vs duration of activity

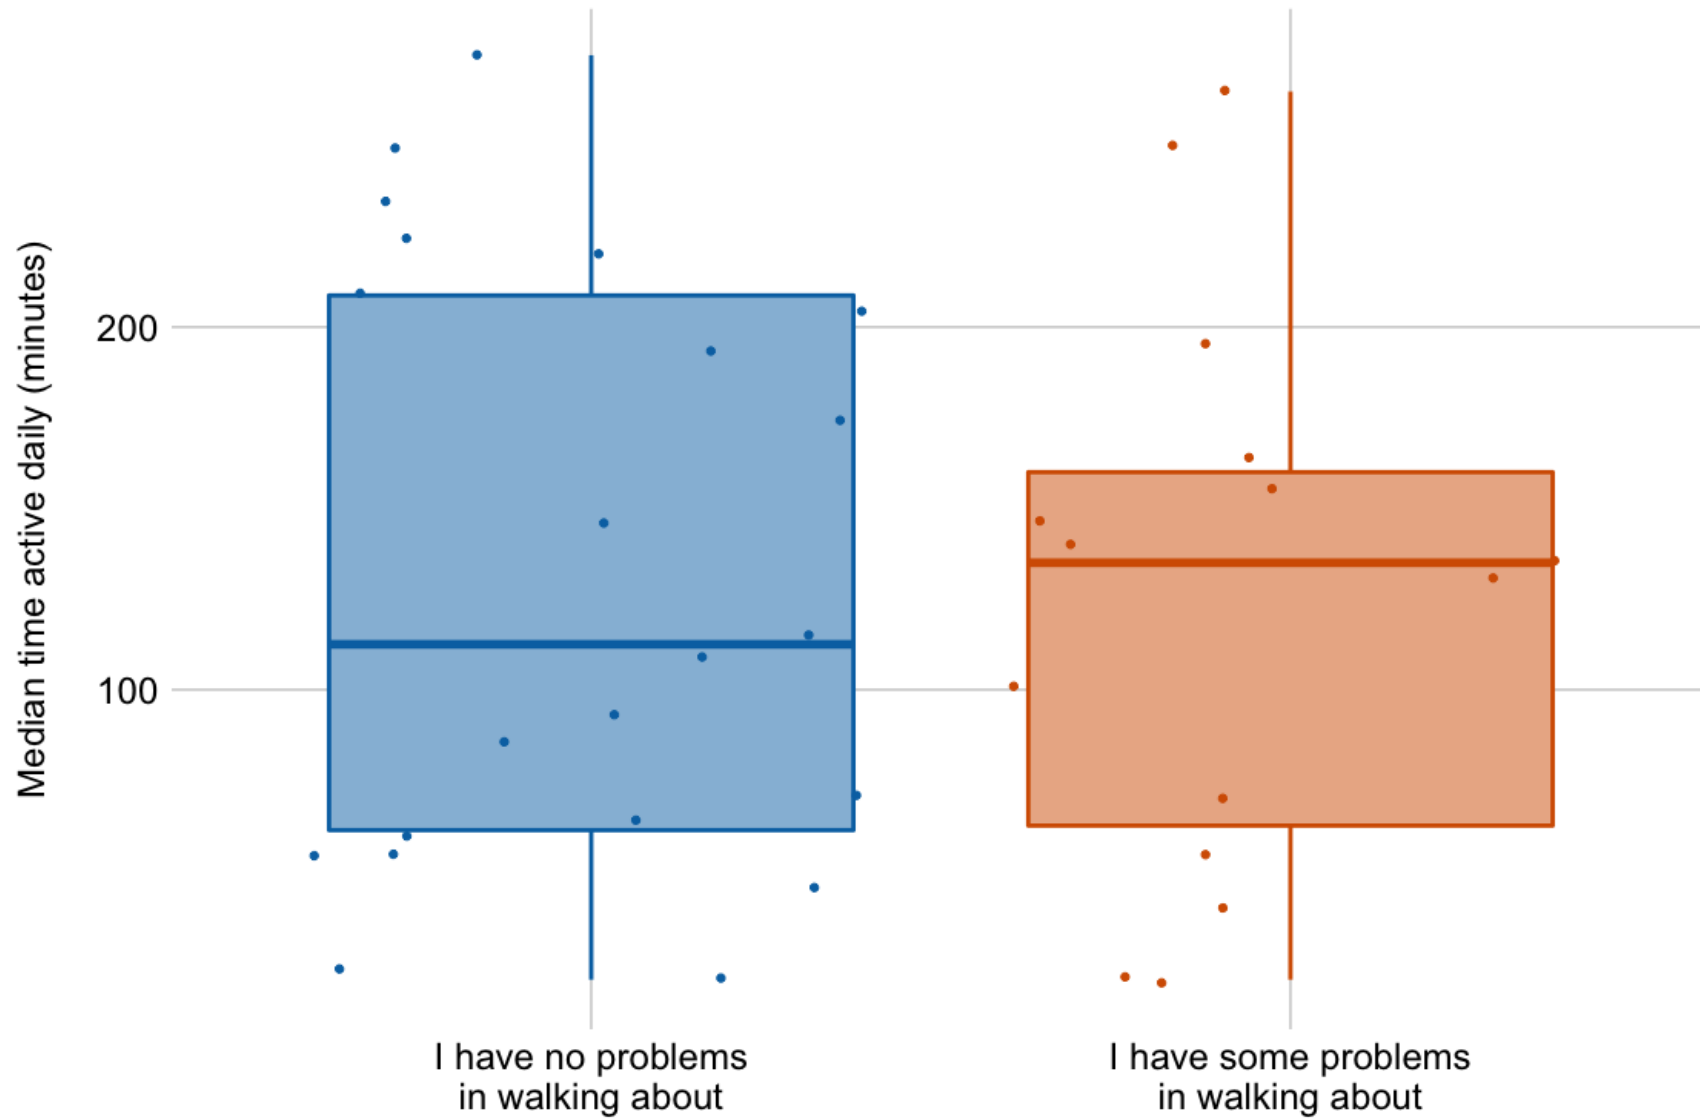

**Worst pain in the last week vs activity**

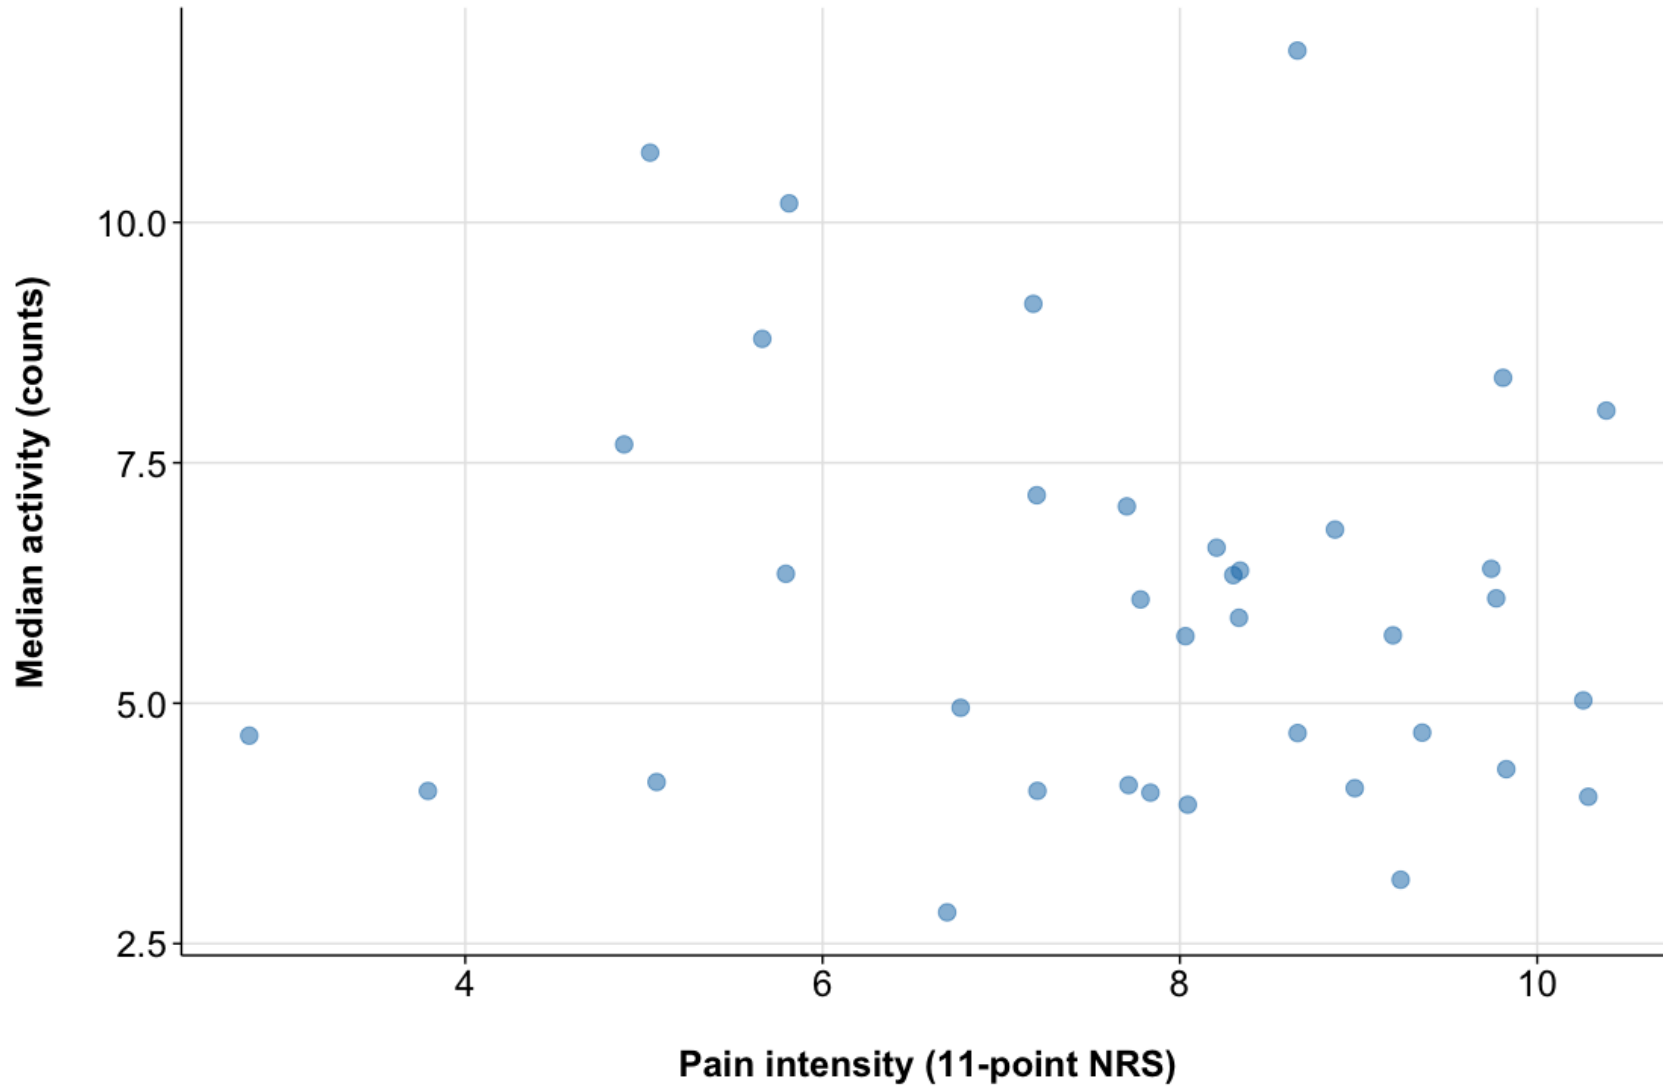

Least pain in the last week vs activity

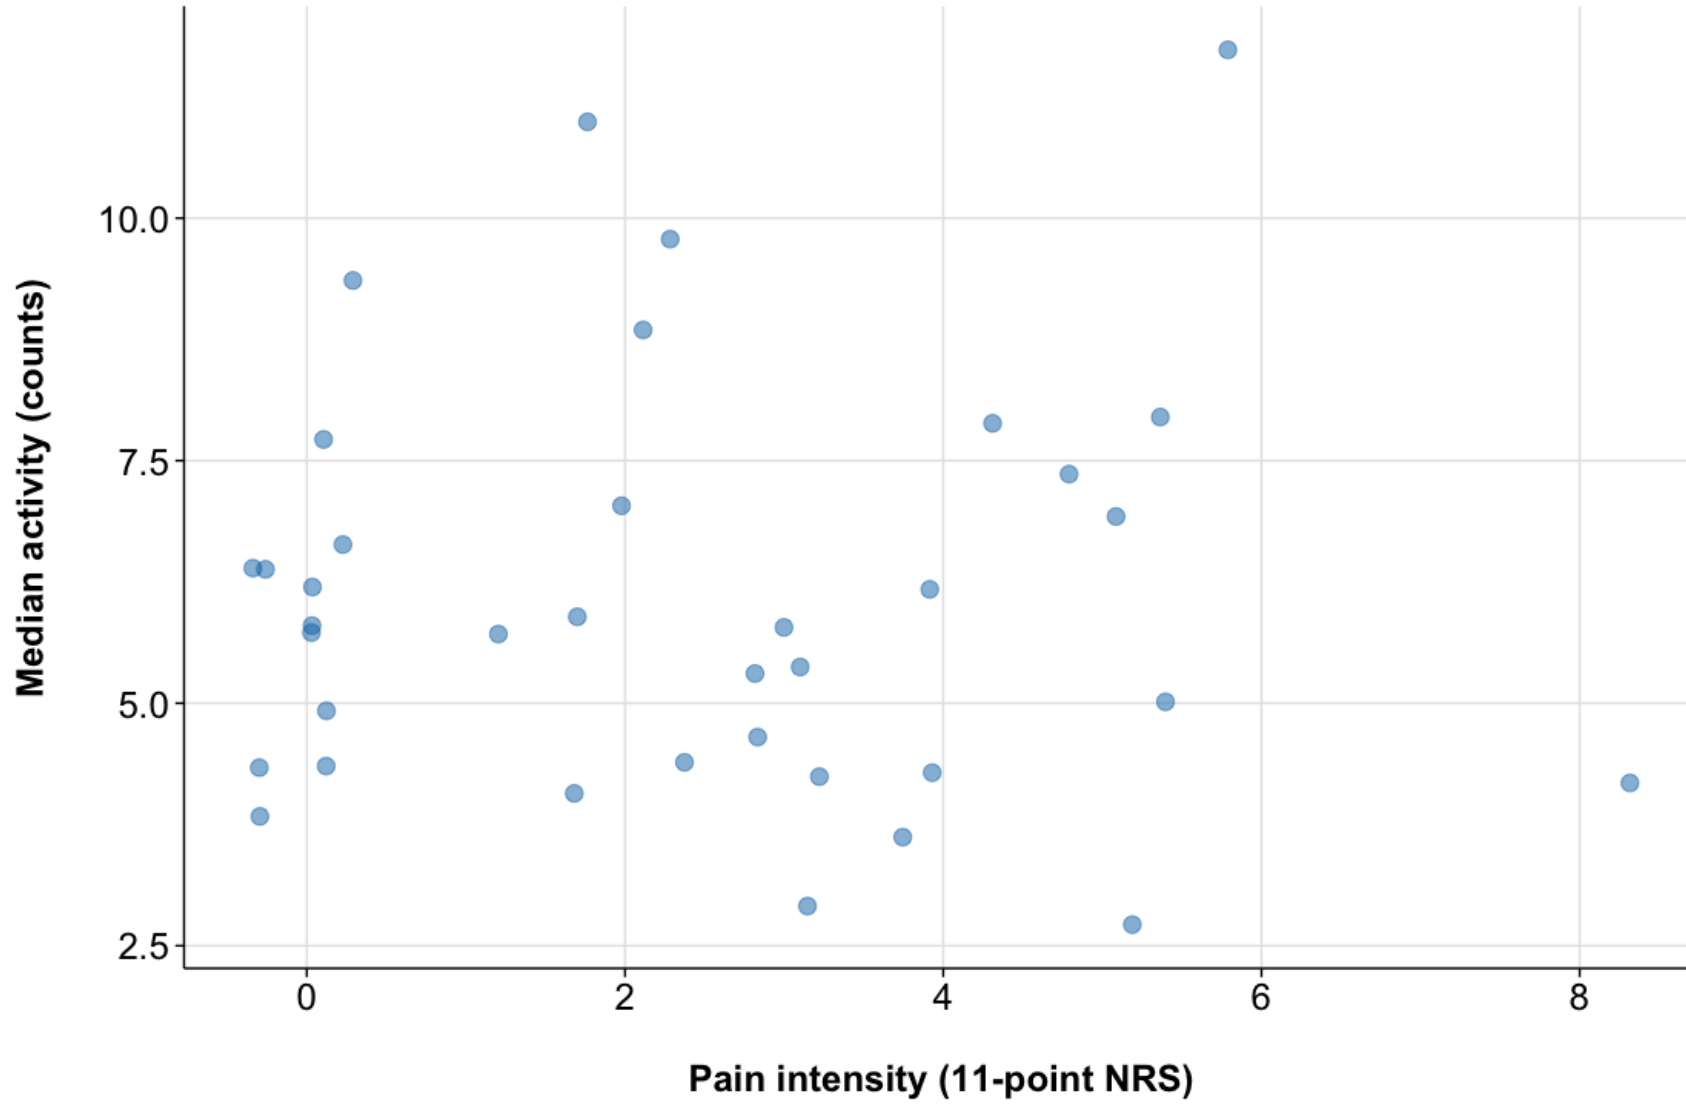

Supplement: peerj-04-2464-s005.pdf [file peerj-04-2464-s005.pdf]
